# Supplementary material
Source: publisher figshare collection journal article supplement (https://acs.figshare.com/ndownloader/files/7301168)
Supplement: Supplementary file 1 [file 7301168]

Supplementary Information for  
**Engineered Interfaces in Hybrid Ceramic-Polymer Electrolytes for use in All-Solid-State Li  
Batteries**

Parameswara Rao Chinnam and Stephanie L. Wunder

Department of Chemistry, Temple University, Philadelphia, PA 19122, USA

## Table of Contents

### Scanning electron microscopy (SEM) and atomic force microscopy (AFM) data

|           |   |
|-----------|---|
| Figure S1 | 3 |
| Figure S2 | 6 |
| Figure S3 | 7 |

### Differential Scanning Calorimetry (DSC) data

|           |   |
|-----------|---|
| Figure S4 | 8 |
|-----------|---|

### Electrochemical Impedance Spectroscopy (EIS) data

|                                                                                                      |    |
|------------------------------------------------------------------------------------------------------|----|
| $Z''$ vs $Z'$ for pure LICGC, Figure S5                                                              | 9  |
| $Z''$ vs $Z'$ for LICGC-SiO <sub>2</sub> , SS electrodes, equivalent circuit, Figure S6              | 10 |
| $Z''$ vs $Z'$ for LICGC-SiO <sub>2</sub> , Li <sup>0</sup> electrodes, equivalent circuit, Figure S7 | 11 |
| Interfacial resistance at 60°C, Figure S8                                                            | 12 |

|            |    |
|------------|----|
| References | 13 |
|------------|----|

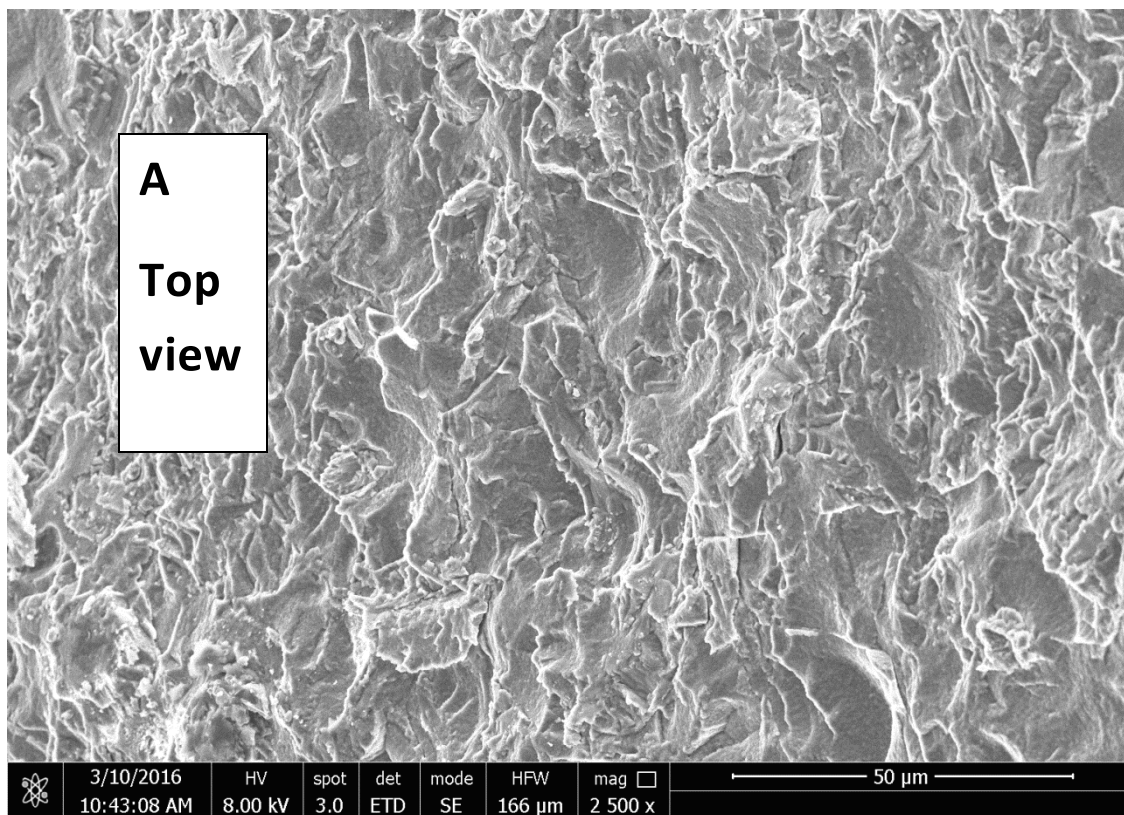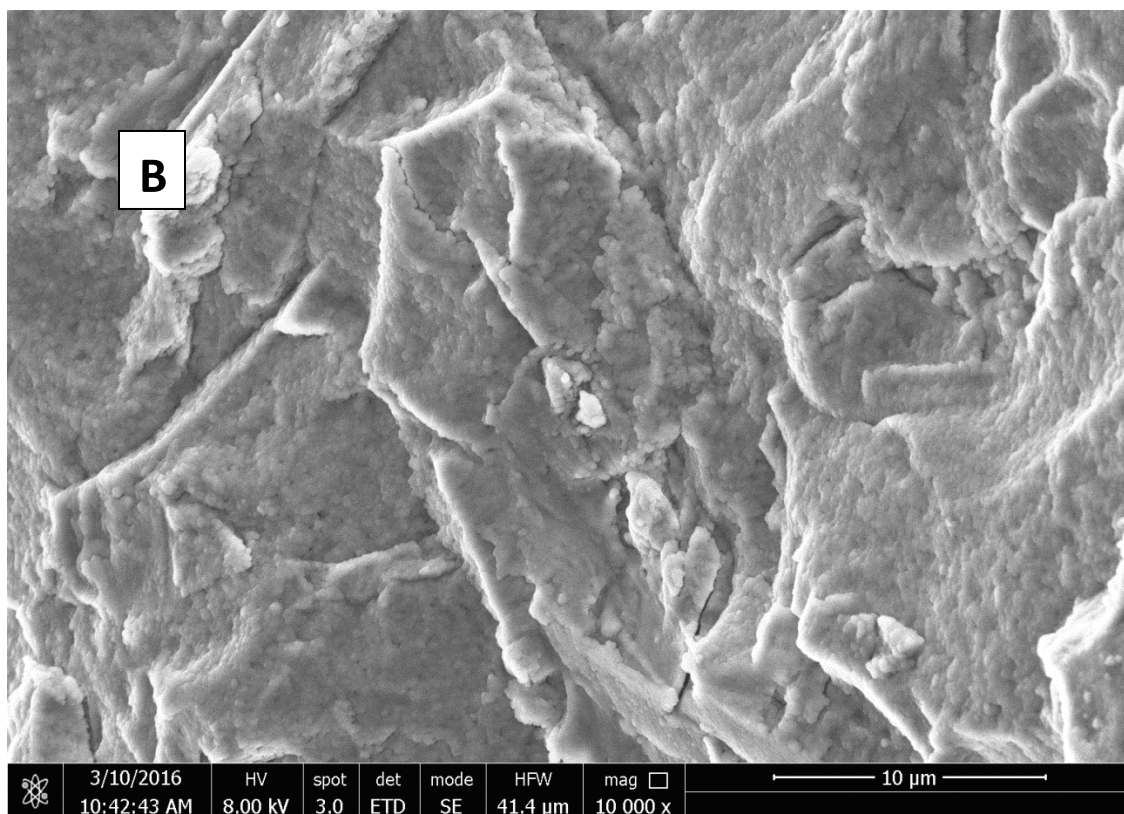

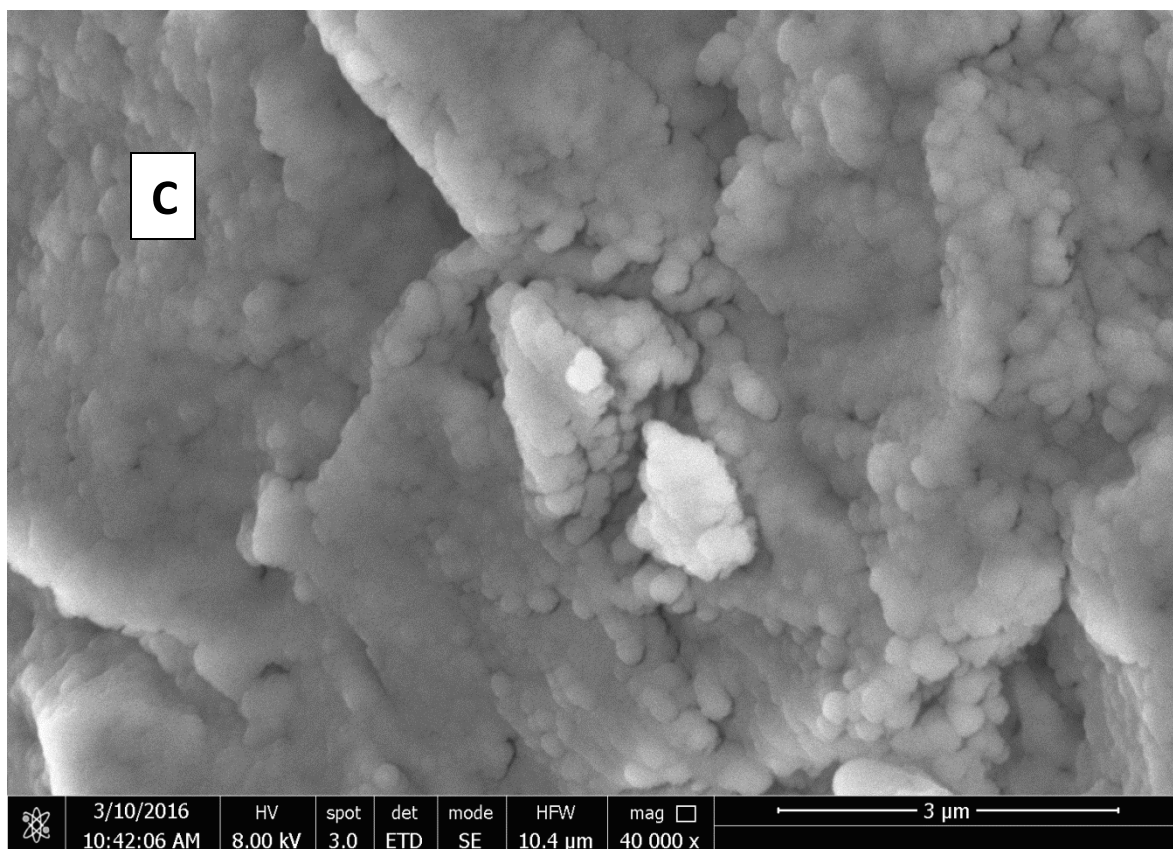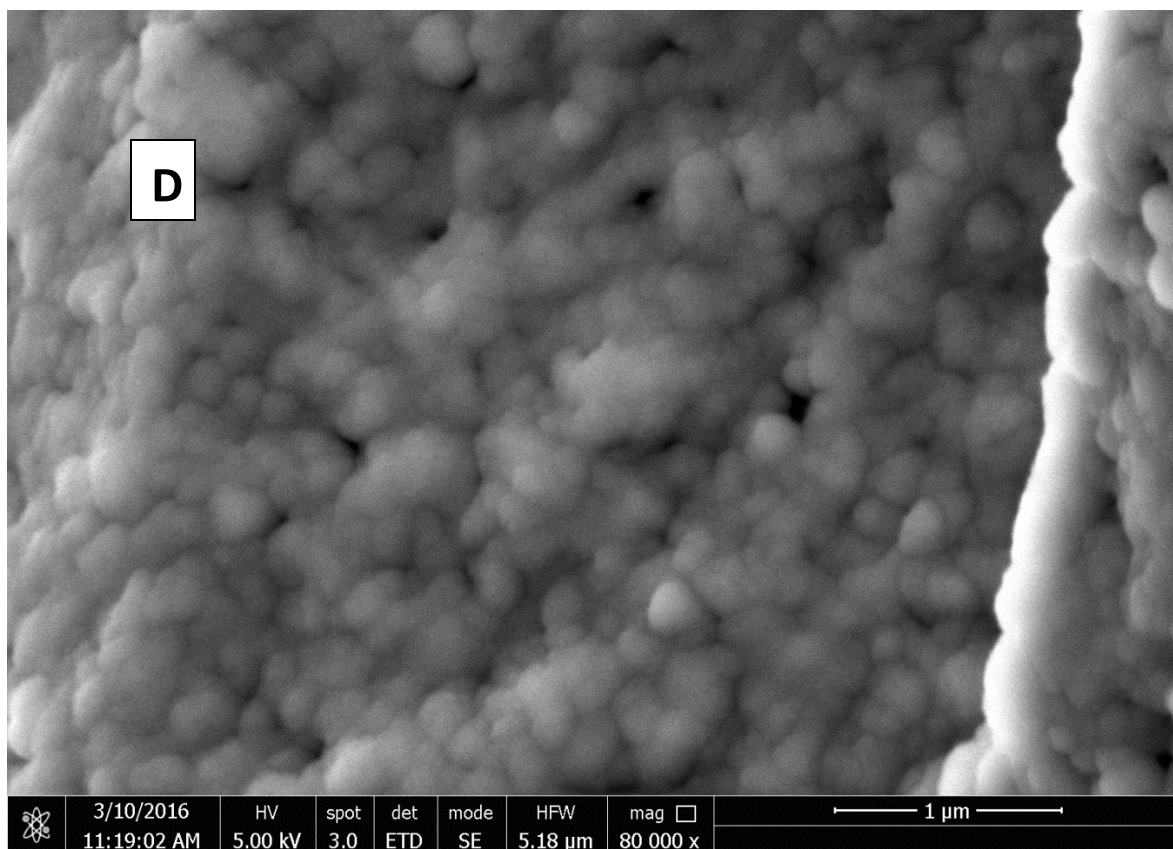

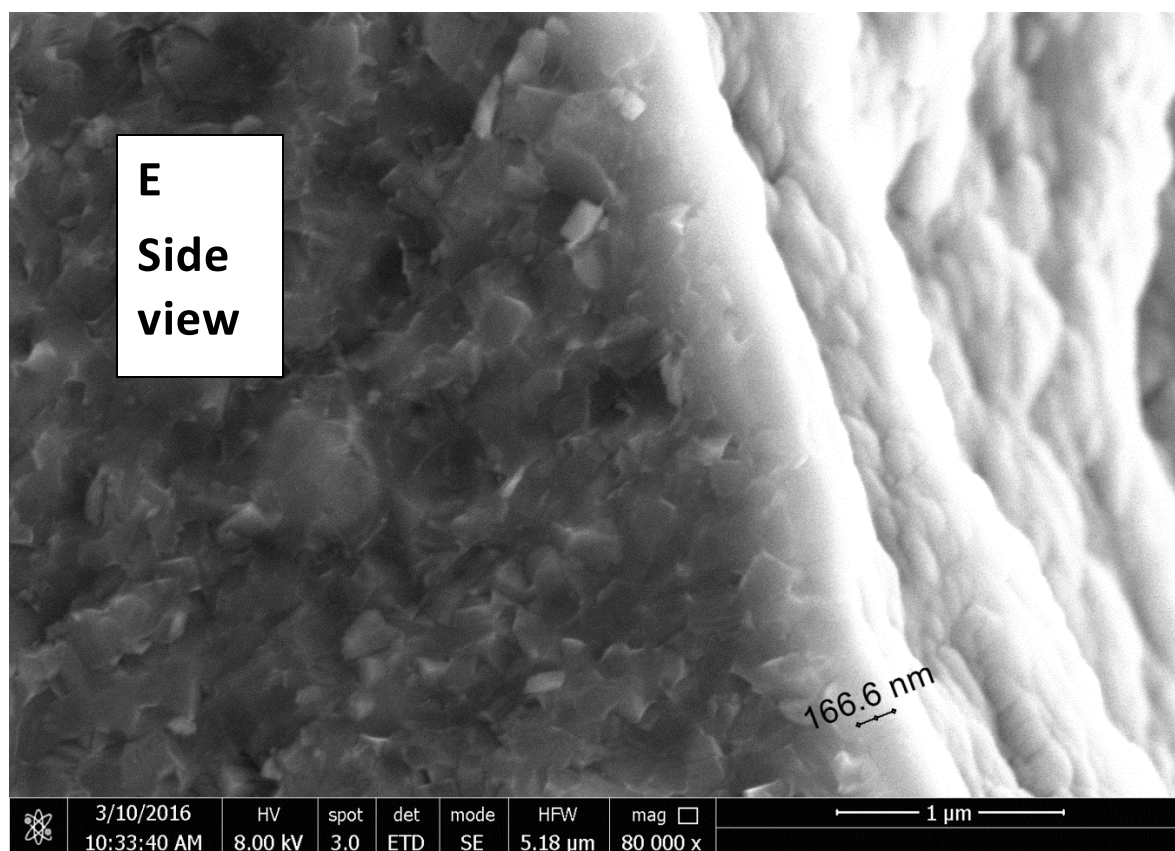

**Figure S1.** SEM images of SiO<sub>2</sub>-LICGC at different magnifications: (A-D) top views; (E) side view showing LICGC and 166 nm conformal SiO<sub>2</sub> coating

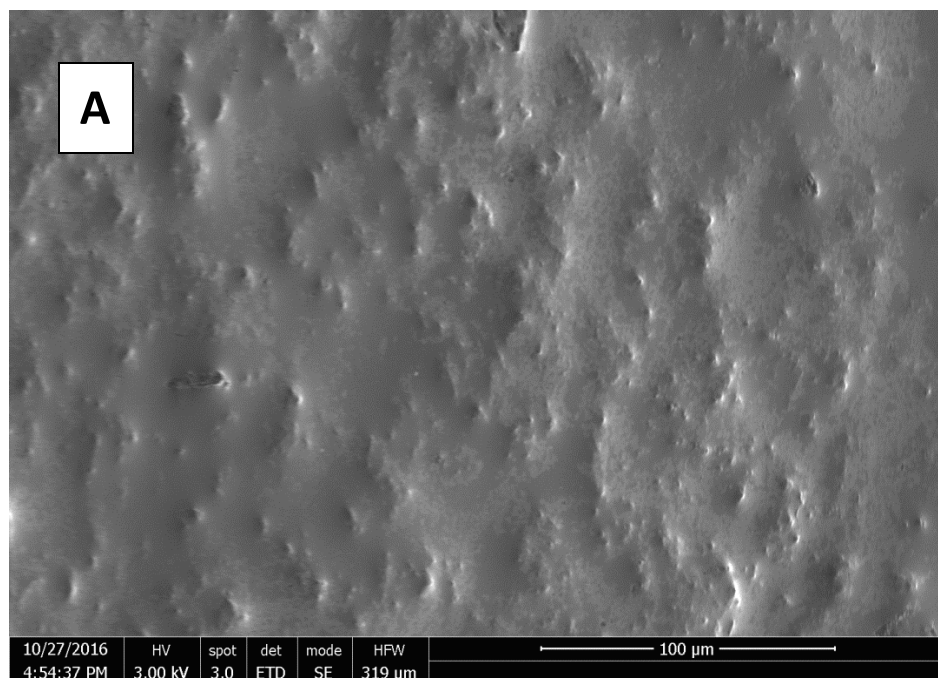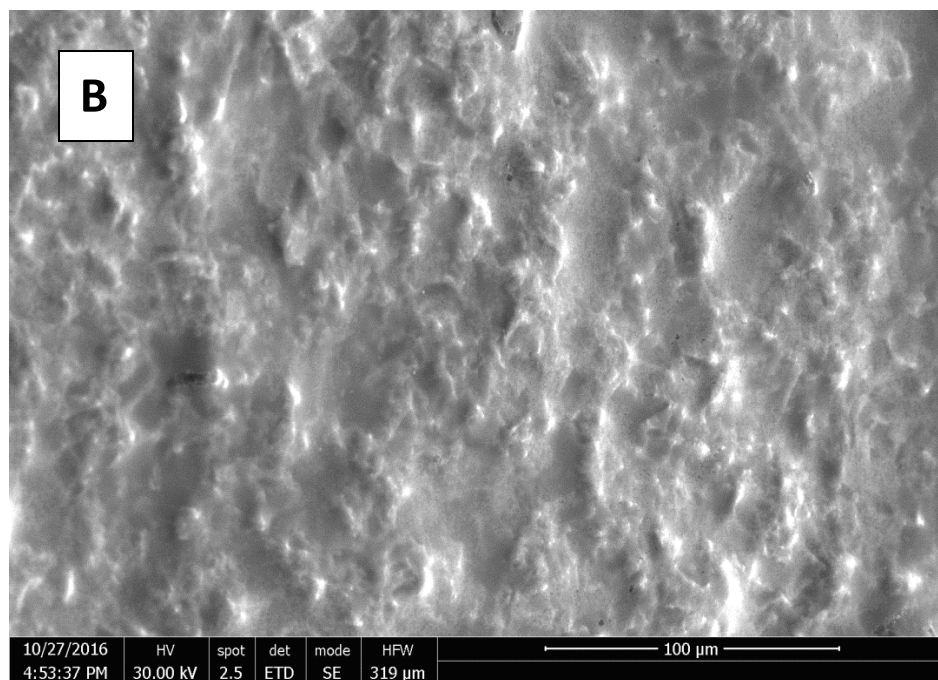

**Figure S2.** SEM images of  $\text{SiO}_2$ -LICGC silanated with PEG-silane/LiTFSI (O/Li = 12/1): **(A)** at 30 KV; **(B)** at 3KV. Secondary electrons are generated at the surface of the sample and provide topographic information. A high accelerating voltage results in most of the primary electrons traveling deeper into the sample and provides information about the sub-surface. Here 30KV was used to see the morphology of the ceramic surface underneath the silanated and crosslinked PEG-silane **(A)**. When a low accelerating voltage is applied, it provides surface information with better resolution, especially for low density samples such as polymers. Here we used 3KV to see the silanated ceramic surface **(B)**. From a comparison of **A** and **B**, it is clear that the surface of LiCGC- $\text{SiO}_2$  is covered with the crosslinked silanated PEG/ $\text{LiClO}_4$ .



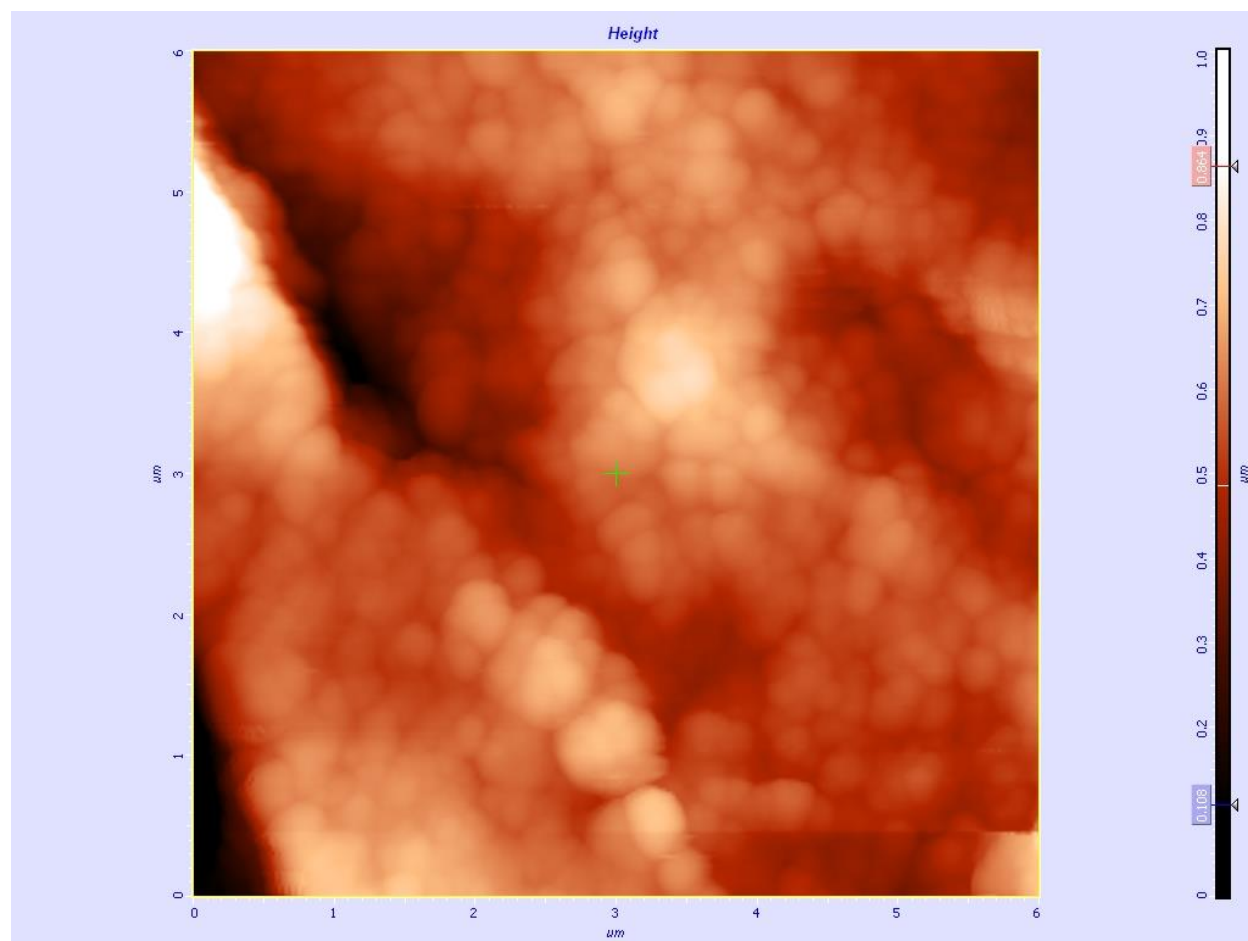

**Figure S3.** AFM image of SiO<sub>2</sub>-LICGC top view

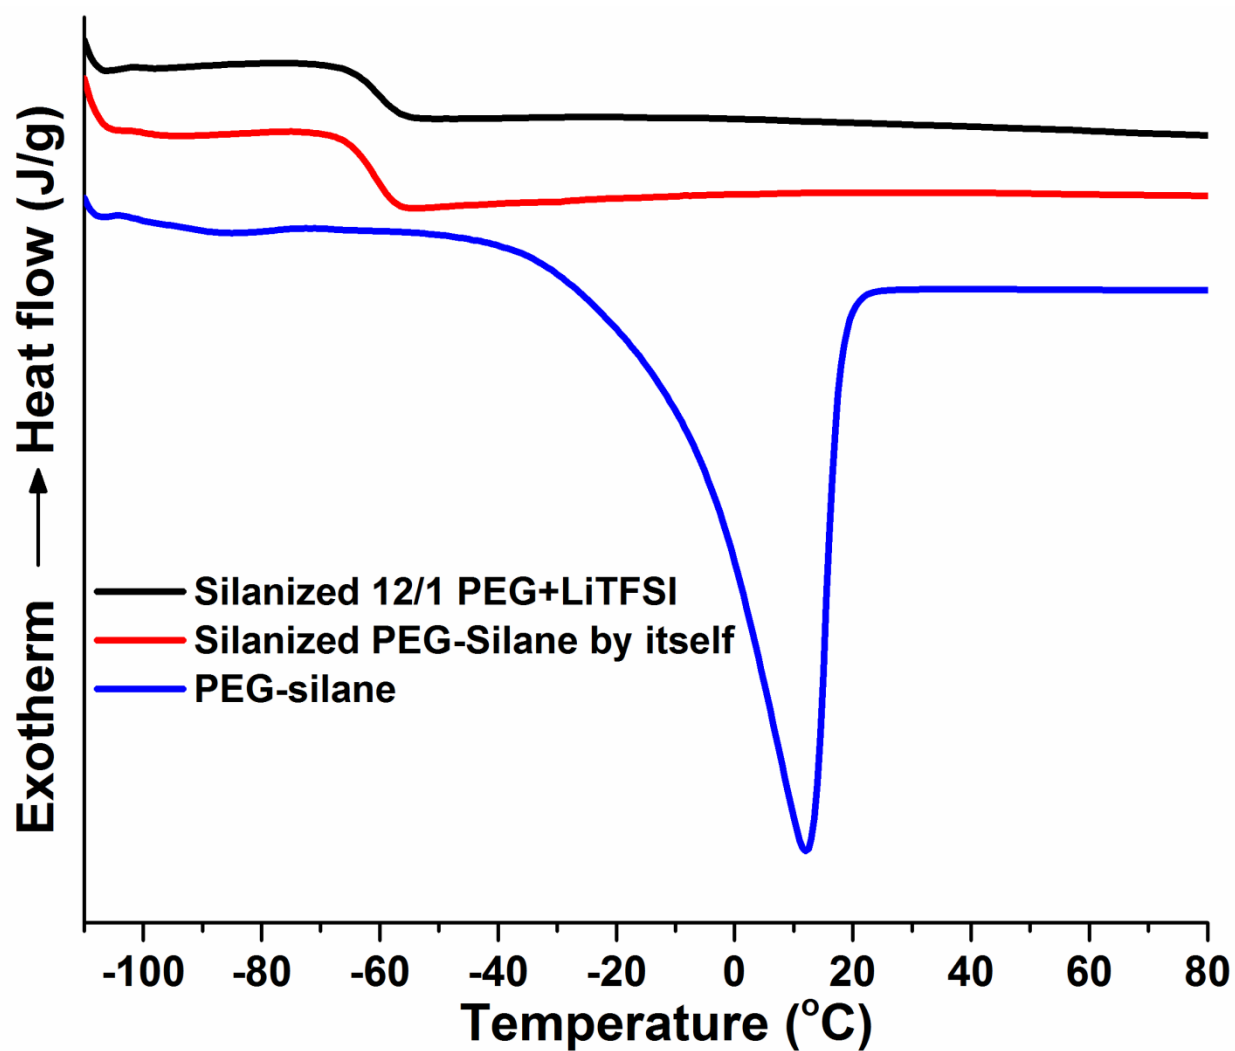

**Figure S4.** DSC data of PEG-silane (—), crosslinked PEG-silane (—) and PEG-silane crosslinked in the presence of LiTFSI (O/Li ) = 12/1 (—). This demonstrates that all of the PEG-silane is bonded/crosslinked with the SiO<sub>2</sub> and that there is no free PEG-silane in the SiO<sub>2</sub> interface.



### EIS data for pure LICGC

EIS data were obtained for pure LICGC between stainless steel (SS) electrodes using conductive carbon paste for good contact. At low temperature there are two distinguishable semicircles. The one at higher frequency (to the left) is attributed to the grain boundary resistance, with the bulk resistance the intercept at high frequency ( $125\ \Omega$ ). The semicircle at lower frequency (to right) is attributed to the resistance between the LICGC and the conductive paste. With increasing temperature, the two semicircles form one broadened semicircle, with the high frequency intercept still the bulk resistance of  $125\ \Omega$  and a conductivity of  $1.5 \times 10^{-4}\ \text{S/cm}$  at  $30\ ^\circ\text{C}$ , in agreement with data provided by the supplier (Ohara Inc).

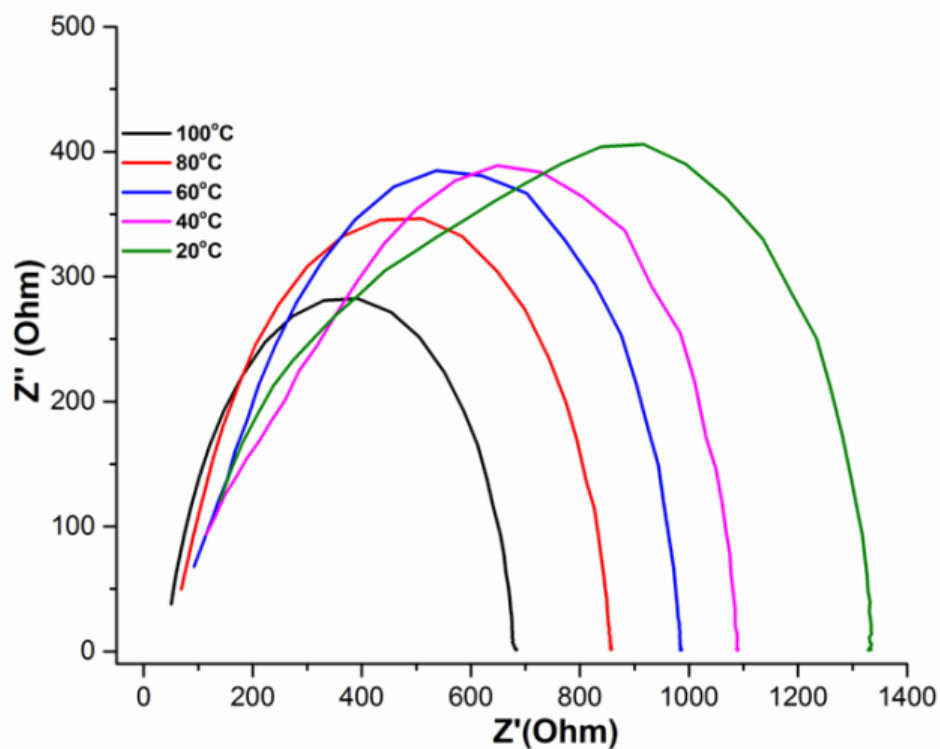

**Figure S5.**  $Z''$  vs  $Z'$  for the LICGC, which was  $\text{Li}_2\text{O}-\text{Al}_2\text{O}_3-\text{SiO}_2-\text{P}_2\text{O}_5-\text{TiO}_2-\text{GeO}_2$ , with a proprietary composition (Ohara glass, Corp.) as a function of temperature

**EIS data with stainless steel blocking electrodes for the SiO<sub>2</sub>-LICGC infused with: (i) G<sub>4</sub>, (ii) G<sub>4</sub>/LiTFSI (O/Li = 4/1) and (iii) silanated with PEG-silane/LiTFSI (O/Li = 12/1)**

The EIS data obtained with blocking stainless steel electrodes (examples shown below) were analyzed using the equivalent circuit shown in **Figure S6**. For these samples, there was good contact with the stainless steel electrodes (unlike the LICGC disc that required carbon paste for adhesion). The Nyquist plots of SiO<sub>2</sub>-LICGC with (i) G<sub>4</sub>; (ii) G<sub>4</sub>/LiTFSI; and (iii) silanated with PEG-silane/LiTFSI (O/Li=12/1), shown below for (ii) and (iii) have similar features. All plots have two resistive components, one at high frequency (at 1MHz) and the other at low frequency (around 25 KHz). The high and low frequency intercepts are attributed to the bulk resistance of LiCGC and the interface resistance of LiCGC-SiO<sub>2</sub> soaked with G<sub>4</sub>LiTFSI or silanated with PEG silane/LiTFSI (O/Li=12/1), respectively. The calculated capacitance values from equivalent circuit fitting for the bulk and interface resistances were in the range 10<sup>-12</sup> to 10<sup>-8</sup> F/cm<sup>2</sup> and 10<sup>-7</sup> to 10<sup>-5</sup> F/cm<sup>2</sup>, respectively. Capacitance values in these ranges are known to correspond to bulk and interfacial impedances<sup>1, 2</sup>. The assignment of the interface resistance of SiO<sub>2</sub>-LiCGC was further checked by incorporating pure G<sub>4</sub> (no salt) in the LICGC-SiO<sub>2</sub>. Pure G<sub>4</sub> increased (doubled) the interface resistance at 30°C, confirming that this frequency region corresponded to the interface resistance.

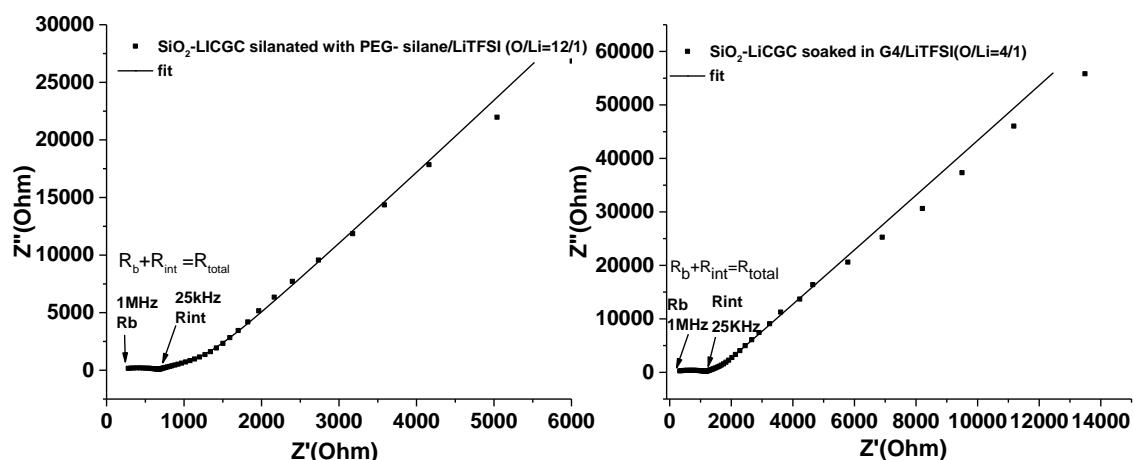

Equivalent circuit used:

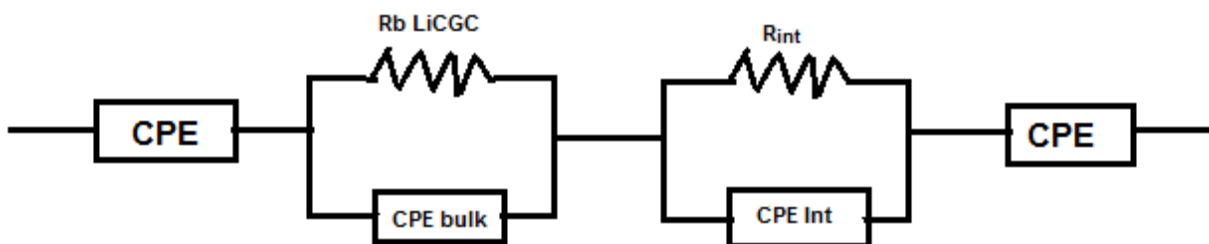

**Figure S6.** Equivalent circuit used to analyze EIS data with stainless steel blocking electrodes.

- CPE is the double layer capacitance at the electrolyte/blocking electrode interfaces;
- R<sub>b</sub> is the bulk resistance of the LICGC;
- R<sub>Int</sub> is the interfacial resistance between the LiCGC and SiO<sub>2</sub> infused with LiG<sub>4</sub>TFSI or between LiCGC and SiO<sub>2</sub> silanated with PEG-silane/ LiTFSI (O/Li=12/1)

**EIS data with  $\text{Li}^0$  electrodes for  $\text{SiO}_2$ -LICGC : (i) soaked with  $\text{G}_4$  (ii) soaked with  $\text{G}_4\text{LiTFSI}$  or (iii) silanated with PEG-silane/ $\text{LiTFSI}$  (O/Li=12/1)**

For  $\text{Li}^0$  non-blocking electrodes, the EIS spectra of  $\text{SiO}_2$ -LICGC silanated with PEG-silane/ $\text{LiTFSI}$  (O/Li = 12/1) or soaked with  $\text{G}_4\text{LiTFSI}$ , were analyzed using the equivalent circuit shown in **Figure S7**). The Nyquist plots of  $\text{SiO}_2$ -LICGC soaked with  $\text{LiG}_4\text{TFSI}$  or silanated with PEG-silane/ $\text{LiTFSI}$  (O/Li=12/1) and  $\text{G}_4$  (only 1 temperature obtained ) have similar features, and are composed of three resistive elements. The example shown below is for  $\text{SiO}_2$ -LICGC silanated with PEG-silane/ $\text{LiTFSI}$  (O/Li=12/1) at 25 °C and 60 °C. There are two resistive components at high frequency (1MHz and 50 KHz at 25 °C) and one at low frequency ( $\sim 1\text{Hz}$  at 25 0C). The 1MHz, 50KHz and 1Hz components are attributed to the bulk resistance of LICGC, the interface resistance between LICGC and  $\text{SiO}_2$  silanated with PEG silane/ $\text{LiTFSI}$  (O/Li=12/1) and the charge transfer resistance with  $\text{Li}^0$  metal, respectively. The calculated capacitance values from equivalent circuit fitting for the bulk, interface and charge transfer resistances were in the range  $10^{-12}$  to  $10^{-8} \text{ F/cm}^2$ ,  $10^{-9}$  to  $10^{-7} \text{ F/cm}^2$  and  $10^{-7}$  to  $10^{-5} \text{ F/cm}^2$  respectively, consistent with values typically observed for these processes<sup>1,2</sup>.

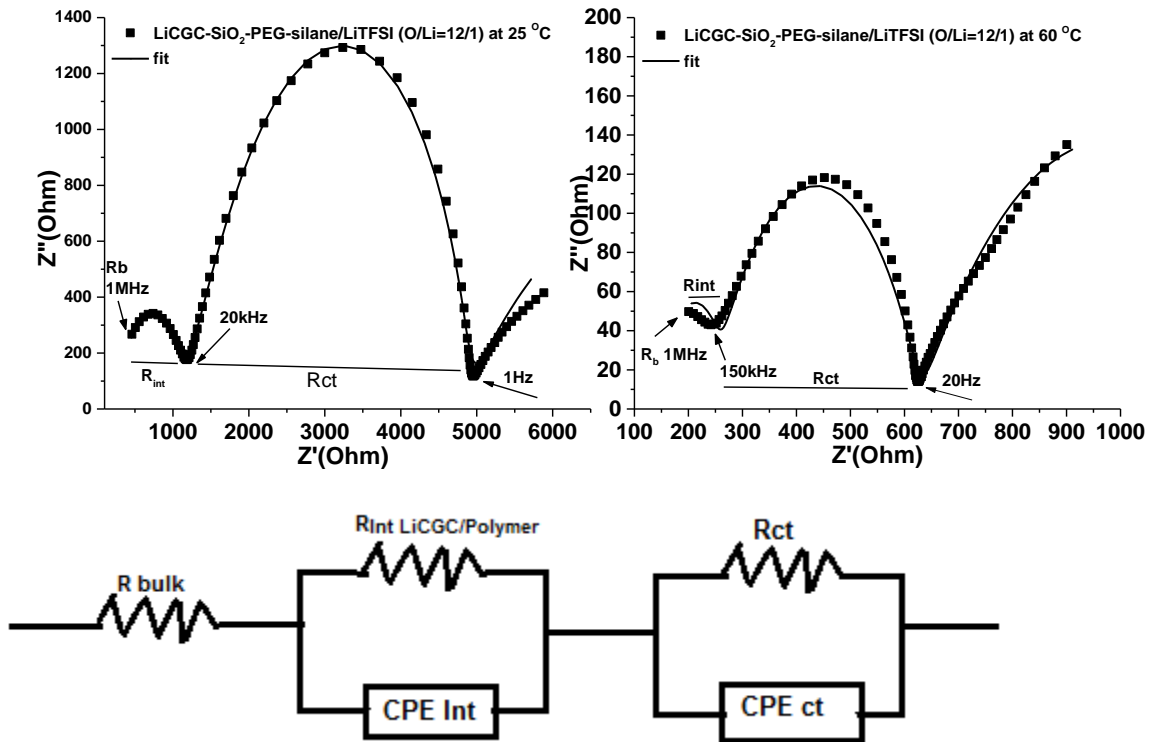

**Figure S7.** Equivalent circuit used for analysis of the EIS spectra with non-blocking  $\text{Li}^0$  electrodes

- $R_b$  is bulk resistance of the LICGC
- $R_{\text{Int}}$  is interfacial resistance between the LICGC and  $\text{SiO}_2$  incorporated with  $\text{LiG}_4\text{TFSI}$ , and between LICGC and  $\text{SiO}_2$  silanated with PEG-silane/ $\text{LiTFSI}$  (O/Li=12/1)
- $R_{\text{CT}}$  is the charge transfer resistance

### Interfacial resistance at 60°C

$Z''$  vs  $Z'$  for  $\text{Li}^0/\text{separator}/\text{Li}^0$  (separator =  $\text{SiO}_2$ -LICGC silanated with PEG-silane/LiTFSI (O/Li = 12/1)) as a function of time at 60 °C. The EIS data at 60 °C has similar features ( $R_{\text{bulk}}$ ,  $R_{\text{interface}}$ ,  $R_{\text{ct}}$ ) to that at 25 °C, as shown in **Figure 3C and Figure S8**. From **Figure 3C and S7**, it is evident that total resistance of the cell at 60 °C decreases by 13 fold compared with the total resistance at 25 °C. The high frequency intercept, which corresponds to the bulk resistance of the LICGC at 25 °C and 60 °C, matches the bulk conductivity of the LICGC measured with carbon paste at the respective temperatures. The decrease in total resistance at high temperatures may be due to better wettability of the electrolyte in contact with the lithium metal at the higher temperature. The interface resistance of the  $\text{SiO}_2$ -LICGC silanated with PEG-silane/LiTFSI (O/Li = 12/1) decreased 6 fold at 60 °C compared with 25 °C. This is attributable to the decreased resistance of both LICGC and  $\text{SiO}_2$  containing silanated PEG-silane in presence of LiTFSI (O/Li = 12/1) as the temperature increases.

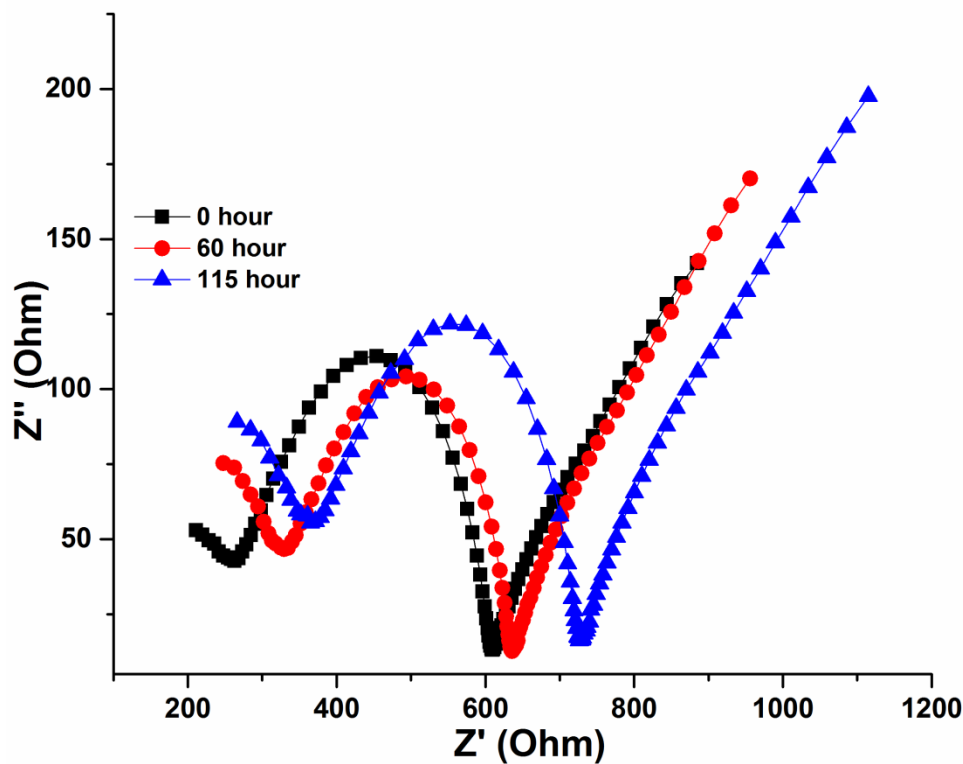

**Figure S8.**  $Z''$  vs  $Z'$  as a function of time at 60 °C,  $\text{Li}^0$  electrodes,  $0.25 \text{ cm}^2$ , for LICGC- $\text{SiO}_2$  silanated with PEG-silane/ LiTFSI (O/Li = 12/1)

1. Irvine, J. T. S.; Sinclair, D. C.; West, A. R., Electroceramics: Characterization by Impedance Spectroscopy. *Advanced Materials* **1990**, 2, (3), 132-138.
2. Huggins, R. A., Simple Method to Determine Electronic and Ionic Components of the Conductivity in Mixed Conductors A Review. *Ionics* **2002**, 8, (3-4), 300-313.
